# Supplementary material for: The P2X7R-NLRP3 and AIM2 Inflammasome Platforms Mark the Complexity/Severity of Viral or Metabolic Liver Damage
Source: MDPI journal article supplement (doi:10.3390/ijms23137447), 2022-07-04
Supplement: s1 [file s1]

**Supplementary Table S1.** Grading and staging of liver biopsies in patients with NAFLD/NASH according to the Brunt score.

|         | NAFLD<br>(n=10) |   |   |   |   |   |   |   |   |    | NASH<br>(n=11) |    |    |    |    |    |    |    |    |    | P  |        |
|---------|-----------------|---|---|---|---|---|---|---|---|----|----------------|----|----|----|----|----|----|----|----|----|----|--------|
| Patient | 1               | 2 | 3 | 4 | 5 | 6 | 7 | 8 | 9 | 10 | 11             | 12 | 13 | 14 | 15 | 16 | 17 | 18 | 19 | 20 | 21 |        |
| Grade   | 1               | 1 | 1 | 1 | 1 | 1 | 1 | 1 | 2 | 1  | 4              | 4  | 4  | 4  | 8  | 4  | 4  | 7  | 4  | 7  | 4  | <0.001 |
| Stage   | 1               | 0 | 1 | 1 | 0 | 0 | 1 | 0 | 0 | 0  | 2              | 2  | 4  | 3  | 4  | 3  | 3  | 3  | 4  | 4  | 3  | <0.001 |

**Supplementary Table S2.** Grading and staging of liver biopsies in patients with HCV according to the Ishak score.

|         | HCV-nMet<br>(n=12) |    |    |    |    |    |    |    |    |    |    |    | HCV-Met<br>(n=13) |    |    |    |    |    |    |    |    |    |    |    | P  |      |
|---------|--------------------|----|----|----|----|----|----|----|----|----|----|----|-------------------|----|----|----|----|----|----|----|----|----|----|----|----|------|
| Patient | 22                 | 23 | 24 | 25 | 26 | 27 | 28 | 29 | 30 | 31 | 32 | 33 | 34                | 35 | 36 | 37 | 38 | 39 | 40 | 41 | 42 | 43 | 44 | 45 | 46 |      |
| Grade   | 7                  | 8  | 6  | 7  | 7  | 5  | 6  | 6  | 6  | 7  | 11 | 7  | 9                 | 7  | 3  | 5  | 7  | 3  | 10 | 5  | 4  | 8  | 8  | 5  | 9  | 0.05 |
| Stage   | 2                  | 5  | 0  | 1  | 3  | 3  | 0  | 0  | 0  | 3  | 5  | 0  | 5                 | 5  | 0  | 5  | 4  | 1  | 0  | 3  | 0  | 4  | 0  | 5  | 3  | 0.75 |

**Supplementary Table S3.** Gene expression of pro-inflammatory cytokines (TNF $\alpha$  and IL-6) and a fibrotic marker (TGF $\beta$ ) in liver biopsies

|              | NAFLD/NASH       |                  |                  | HCV              |                               |                               | P*    | P**   |
|--------------|------------------|------------------|------------------|------------------|-------------------------------|-------------------------------|-------|-------|
|              | All<br>(n=20)    | NAFLD<br>(n=9)   | NASH<br>(n=11)   | All<br>(n=23)    | HCV-nMet<br>(n=12)            | HCV-Met<br>(n=11)             |       |       |
| TNF $\alpha$ | 0.52 [0.29-1.13] | 0.37 [0.20-0.45] | 1.12 [0.52-1.81] | 1.43 [0.98-2.33] | 1.54 [0.98-3.84] <sup>a</sup> | 1.43 [0.82-1.89] <sup>a</sup> | 0.003 | 0.001 |
| IL-6         | 2.38 [0.98-3.72] | 2.38 [2.03-3.42] | 2.13 [0.86-4.72] | 6.30 [2.71-11.2] | 4.11 [2.00-9.19]              | 8.72 [3.45-12.4]              | 0.04  | 0.14  |
| TGF $\beta$  | 0.37 [0.20-0.76] | 0.23 [0.18-0.45] | 0.46 [0.35-1.53] | 0.42 [0.33-0.74] | 0.37 [0.29-1.61]              | 0.46 [0.41-0.67]              | 0.16  | 0.056 |

Data are reported as median [range].

\* p value for the difference between the two main groups (NAFLD/NASH vs HCV).

\*\* p value for the difference between the 4 subgroups (NAFLD, NASH, HCV-nMet, HCV-Met).

<sup>a</sup> p<0.05 for the difference with the NAFLD subgroup.

**Supplementary Table S4.** List of Antibodies

| Protein       | Antibody Reference | Dilution | Company                             |
|---------------|--------------------|----------|-------------------------------------|
| P2X7 receptor | APR-004            | 1:100    | Alomone Labs, Jerusalem, Israel     |
| NLRP3         | AG-20B-0014        | 1:200    | AdipoGen, San Diego, CA, USA        |
| AIM2          | SC-293174          | 1:50     | Santa Cruz Biotech, Dallas, TX, USA |

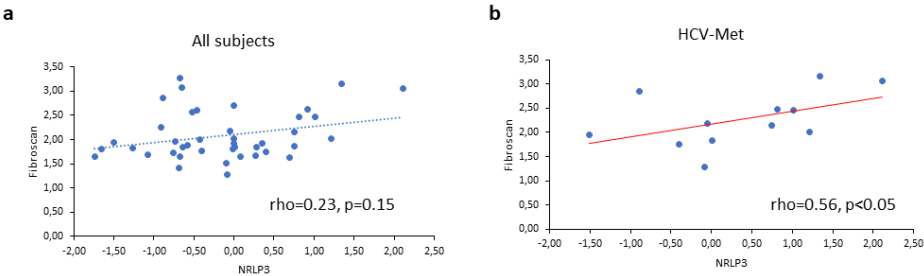

**Supplementary Figure S1** Linear relationship between Fibroscan index and liver NLRP3 expression in all subjects (a) and in the HCV-Met subgroup (b).
